## Predictors of steroid-refractory immune checkpoint inhibitor associated myocarditis

J. Power<sup>1</sup>, W. Meijers<sup>1</sup>, C. Fenioux<sup>2</sup>, Y. Tamura<sup>3</sup>, A. Asnani<sup>4</sup>, J. Alexandre<sup>5</sup>, J. Cautela<sup>6</sup>, M. Aras<sup>7</sup>, L. Lehmann<sup>8</sup>, M. Perl<sup>9</sup>, A. Narezkina<sup>10</sup>, L. Gilstrap<sup>11</sup>, S. Ederhy<sup>2</sup>, J. Moslehi<sup>1</sup>, J. Salem<sup>2</sup>

<sup>1</sup>Vanderbilt University Medical Center, Nashville, United States of America; <sup>2</sup>Sorbonne University, Paris, France; <sup>3</sup>International University of Health and Welfare, Narita, Japan; <sup>4</sup>Beth Israel Deaconess Medical Center & Harvard Medical School, Boston, United States of America; <sup>5</sup>University Hospital of Caen, Caen, France; <sup>6</sup>Hospital Nord of Marseille, Marseille, France; <sup>7</sup>University of California San Francisco, San Francisco, United States of America; <sup>8</sup>University of Heidelberg, Heidelberg, Germany; <sup>9</sup>Tel Aviv Sourasky Medical Center, Tel Aviv, Israel; <sup>10</sup>University of California San Diego, San Diego, United States of America; <sup>11</sup>Dartmouth-Hitchcock Health, Lebanon, United States of America

**Funding Acknowledgement:** Type of funding source: Private hospital(s). Main funding source(s): National Institutes of Health

**Background/Introduction:** Immune checkpoint inhibitor (ICI)-associated myocarditis has a high mortality rate of approximately 50%. Clinical decompensation often occurs despite first-line treatment with corticosteroids. Factors associated with steroid failure are currently unknown.

**Purpose:** To identify predictors of steroid failure in patients with ICI-associated myocarditis.

**Methods:** We developed a web-based registry to collect and study 157 cases with clinical manifestations of ICI-associated myocarditis across 16 countries. Steroid failure was defined as patients who were escalated to immunomodulators after  $\geq 1$ mg/kg daily dose of prednisone or had in-hospital death due to myocarditis despite  $\geq 1$ mg/kg daily dose of prednisone. Steroid response was defined as all other patients treated with steroids without escalation to immunomodulators and without death due to myocarditis. A multivariate logistic model accounting for age and sex was used to predict association with steroid failure.

**Results:** Compared to steroid responsive cases, steroid failure was more likely to result in fulminant myocarditis (56.7% vs 19.6%, OR=5.37 [2.62–10.98]  $p < 0.001$ ) and all-cause in-hospital mortality (49.1% vs 12.9%, OR=6.50 [2.86–14.73]  $p < 0.001$ ) with shorter time from presentation to death (27.5 vs 43.0 days HR: 2.56 [1.45–4.50]  $p = 0.001$ ). When adjusting for age and sex, cases were more likely to be steroid-refractory if they

were female (46.7% vs 30.1%, OR=2.77 [1.31–5.85]  $p = 0.007$ ), higher body mass index (27.2 vs 22.0, OR=1.09 [1.01–1.18]  $p = 0.012$ ), had higher intake creatine kinase (2800.5 vs 528.0 U/L, OR=1.48 [1.14–1.90]  $p = 0.003$ ) had higher intake troponin T (1.40 vs 0.25 ng/mL OR=1.63 [1.00–2.64]  $p = 0.049$ ), or had one or more concomitant non-cardiac immune-related adverse event (90.0% vs 74.2%, OR=3.10 [1.14–8.25]  $p < 0.026$ ). The only immune-related adverse events independently associated with steroid failure in myocarditis were myasthenia gravis-like syndrome (26.7% vs 8.2%, OR=3.84 [1.47–10.10]  $p = 0.006$ ) and myositis (45.0% vs 24.7%, OR=2.38 [1.16–4.92]  $p = 0.018$ ). Steroid failure was not significantly associated with cardiovascular or autoimmune history but was associated with a history of thymoma (12.0% vs 2.6%, OR=18.86 [0.10–356.7]  $p = 0.05$ )

**Conclusion(s):** Features such as female sex, high body mass index, and pre-existing thymoma as well as findings of elevated cardiac biomarkers and other non-cardiac immune-related adverse events – particularly myositis and myasthenia gravis-like syndrome – may represent a steroid-refractory phenotype of ICI-associated myocarditis. These results suggest that a multidisciplinary approach to diagnosing concomitant non-cardiac immune related adverse events is key to risk-stratifying ICI-associated myocarditis.

### Associations with Steroid Refractory ICI-Associated Myocarditis

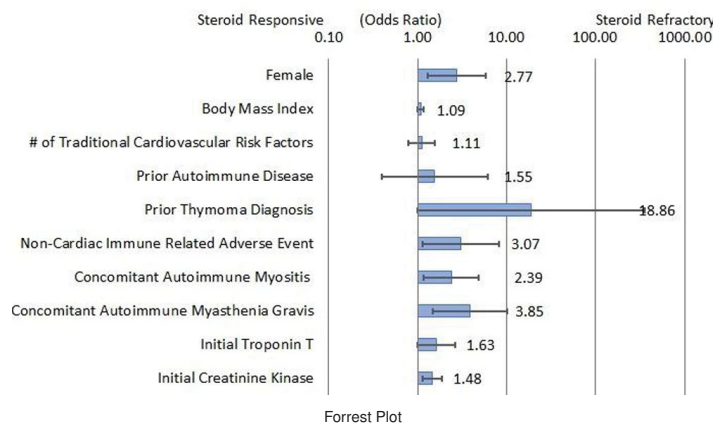

Source: http://academic.oup.com/eurheartj/article-pdf/41/Supplement_2/ehaa946.3272/34517775/ehaa946.3272.pdf
